# Supplementary material for: Genome scan identifies flowering-independent effects of barley HsDry2.2 locus on yield traits under water deficit
Source: PubMed Central journal article supplement (PMC5888960; doi:10.1093/jxb/ery016), 2018-01-08
Supplement: ery016_suppl_supplementary_tables.pdf [file ery016_suppl_supplementary_tables.pdf]

**Supplementary data**

**Manuscript Title:** Genome scan identifies flowering-independent effects of barley HsDry2.2 locus on yield traits under water deficit **Authors:** Lianne Merchuk-Ovnat\*, Roi Silberman\*, Efrat Laiba, Andreas Maurer, Klaus Pillen, Adi Faigenboim, Eyal Fridman

Table S1 Primers used for HRM and HvCEN sequencing

| <b>Primer name</b> |   | <b>Use</b>                                    | <b>sequence</b>          |
|--------------------|---|-----------------------------------------------|--------------------------|
| PM58               | F | HRM for BOPA2_12_30265                        | AGGTTTCCCTCGGGTTCAG      |
| PM59               | R | HRM for BOPA2_12_30265                        | GGCAGGGTACGTCTGTCTCT     |
| PM206              | F | (HORVU2Hr1G072750)<br>sequencing <i>HvCEN</i> | AGCTATGCGTAAAAACATGCTTGA |
| PM271              | F | (HORVU2Hr1G072750)<br>sequencing <i>HvCEN</i> | TGTAGGCGCATAACATGGCAA    |
| PM272              | R | (HORVU2Hr1G072750)<br>sequencing <i>HvCEN</i> | GGTTACCAGTGGAGGTGCTC     |
| PM273              | F | (HORVU2Hr1G072750)<br>sequencing <i>HvCEN</i> | AATGGCCACGAGTTCTTCCC     |
| PM274              | R | (HORVU2Hr1G072750)<br>sequencing <i>HvCEN</i> | TGTTGGAACAGCACGAAGGT     |
| PM275              | R | (HORVU2Hr1G072750)                            | ACATGGAGGGAGGGAGAACA     |

**Supplementary data****Manuscript Title:** Genome scan identifies flowering-independent effects of barley HsDry2.2 locus on yield traits under water deficit**Authors:** Lianne Merchuk-Ovnat\*, Roi Silberman\*, Efrat Laiba, Andreas Maurer, Klaus Pillen, Adi Faigenboim, Eyal Fridman

Table S2 Traits distribution and heritability values under WW and WL environments

h<sup>2</sup>, Broad-sense heritability calculated as proportion of variance explained by genotype across two years

| Year | Trait | Units | WW   |      |     |     |      |      | WL   |       |      |      |      |      | WL/WW |
|------|-------|-------|------|------|-----|-----|------|------|------|-------|------|------|------|------|-------|
|      |       |       | N    | Mean | Min | Max | STD  | cv   | N    | Mean  | Min  | Max  | STD  | cv   |       |
| 2015 | GFP   | Days  | 1399 | 36   | 15  | 58  | 6.4  | 17.9 | 1359 | 29.7  | 10   | 60   | 7    | 23.6 | 0.8   |
| 2015 | GN    | #     | 1294 | 297  | 34  | 681 | 104  | 34.9 | 1000 | 204.7 | 3    | 710  | 135  | 66.1 | 0.7   |
| 2015 | GW    | Gram  | 1292 | 66.5 | 23  | 227 | 16.1 | 24.2 | 995  | 37.5  | 0.2  | 125  | 18.2 | 48.6 | 0.6   |
| 2015 | PGY   | Gram  | 1413 | 17.8 | 0.1 | 41  | 6.3  | 35.1 | 1029 | 7.5   | 0.1  | 33.4 | 6.7  | 89.1 | 0.4   |
| 2015 | HEA   | Days  | 1429 | 97.1 | 80  | 120 | 7.6  | 7.8  | 1407 | 96.4  | 81   | 118  | 7.6  | 7.9  | 1     |
| 2015 | HEI   | cm    | 1428 | 72.8 | 45  | 126 | 12.9 | 17.7 | 1424 | 63.2  | 31   | 120  | 12.8 | 20.3 | 0.9   |
| 2015 | HI    | %     | 1385 | 31   | 0.1 | 69  | 9.9  | 32.1 | 1381 | 13.5  | 0.1  | 56.6 | 15   | 111  | 0.4   |
| 2015 | MAT   | Days  | 1403 | 133  | 101 | 152 | 6.9  | 5.2  | 1383 | 125.5 | 108  | 157  | 7.4  | 5.9  | 0.9   |
| 2015 | TDM   | Gram  | 1387 | 59.6 | 15  | 118 | 15   | 25.2 | 1382 | 42.1  | 10   | 112  | 13.3 | 31.5 | 0.7   |
| 2015 | VDW   | Gram  | 1371 | 41.2 | 5.2 | 80  | 13.2 | 32.1 | 1372 | 36.2  | 7    | 79.9 | 12.8 | 35.4 | 0.9   |
| 2016 | GFP   | Days  | 1280 | 33.3 | 10  | 64  | 5.4  | 16.2 | 1273 | 30.1  | 15   | 64   | 6.7  | 22.4 | 0.9   |
| 2016 | GN    | #     | 1156 | 300  | 26  | 730 | 93.4 | 31.1 | 1136 | 180   | 4    | 562  | 89.4 | 49.7 | 0.6   |
| 2016 | GW    | Gram  | 1147 | 46.2 | 14  | 72  | 6.0  | 13.0 | 1111 | 41.9  | 3    | 92   | 7.5  | 17.8 | 0.9   |
| 2016 | PGY   | Gram  | 1277 | 13.9 | 0.9 | 30  | 4.3  | 31.3 | 1250 | 7.6   | 0.1  | 20.9 | 3.9  | 50.9 | 0.5   |
| 2016 | HEA   | Days  | 1284 | 104  | 74  | 124 | 8.3  | 8    | 1294 | 102.2 | 74   | 125  | 8.7  | 8.5  | 1     |
| 2016 | HEI   | cm    | 1295 | 70.2 | 40  | 115 | 11.5 | 16.4 | 1291 | 59.1  | 30   | 98   | 10.9 | 18.4 | 0.8   |
| 2016 | HI    | %     | 1270 | 30.8 | 2.7 | 65  | 8.1  | 26.3 | 1245 | 22    | 0.3  | 73.6 | 10.3 | 46.7 | 0.7   |
| 2016 | MAT   | Days  | 1281 | 137  | 120 | 149 | 6.5  | 4.8  | 1274 | 132.2 | 100  | 149  | 5.9  | 4.5  | 1     |
| 2016 | TDM   | Gram  | 1289 | 45.2 | 11  | 83  | 10   | 22   | 1287 | 34.8  | 13.6 | 71.4 | 9.3  | 26.7 | 0.8   |
| 2016 | VDW   | Gram  | 1270 | 31.5 | 11  | 66  | 8.2  | 26   | 1243 | 27.3  | 5.7  | 58.7 | 8.1  | 29.6 | 0.9   |

| Year  | Trait | Units | WW   |      |     |     |      |      |      | WL   |      |      |      |      |      |      | WL/<br>WW |
|-------|-------|-------|------|------|-----|-----|------|------|------|------|------|------|------|------|------|------|-----------|
|       |       |       | N    | Mean | Min | Max | STD  | cv   | h2   | N    | Mean | Min  | Max  | STD  | cv   | h2   |           |
| 15&16 | GFP   | Days  | 1296 | 36   | 19  | 61  | 4.9  | 13.6 | 0.62 | 1292 | 30.1 | 11.1 | 52.3 | 5.6  | 18.6 | 0.68 | 0.8       |
| 15&16 | GN    | #     | 1295 | 301  | 48  | 686 | 79.2 | 26.4 | 0.69 | 1244 | 207  | 5.7  | 583  | 96.4 | 46.5 | 0.55 | 0.7       |
| 15&16 | GW    | Gram  | 1453 | 66.4 | 29  | 175 | 11.2 | 16.9 | 0.71 | 1453 | 41.0 | 0    | 92   | 11.2 | 27.3 | 0.52 | 0.6       |
| 15&16 | GY    | Gram  | 1296 | 18.3 | 7   | 32  | 4.1  | 22.1 | 0.72 | 1283 | 7.6  | 0.1  | 24.9 | 4.1  | 53.2 | 0.55 | 0.4       |
| 15&16 | HEA   | Days  | 1296 | 103  | 82  | 125 | 7.5  | 7.3  | 0.6  | 1294 | 102  | 80.9 | 122  | 7.7  | 7.5  | 0.65 | 1         |
| 15&16 | HEI   | cm    | 1296 | 72.6 | 47  | 110 | 10.1 | 14   | 0.63 | 1295 | 63.2 | 37.6 | 101  | 9.9  | 15.7 | 0.62 | 0.9       |
| 15&16 | HI    | %     | 1254 | 31.6 | 7.3 | 57  | 6.8  | 21.5 | 0.75 | 1220 | 22.2 | 0.3  | 66   | 13.7 | 61.7 | 0.55 | 0.7       |
| 15&16 | MAT   | Days  | 1296 | 137  | 119 | 157 | 5.7  | 4.2  | 0.59 | 1292 | 132  | 121  | 153  | 5.7  | 4.3  | 0.66 | 1         |
| 15&16 | TDM   | Gram  | 1274 | 59.9 | 28  | 106 | 11.1 | 18.5 | 0.67 | 1265 | 42.2 | 16.7 | 79.1 | 9.4  | 22.3 | 0.63 | 0.7       |
| 15&16 | VDW   | Gram  | 1242 | 41.1 | 14  | 79  | 9.7  | 23.6 | 0.62 | 1212 | 36.2 | 14.8 | 66.1 | 9.1  | 25.1 | 0.59 | 0.9       |

**Supplementary data**

**Manuscript Title:** Genome scan identifies flowering-independent effects of barley HsDry2.2 locus on yield traits under water deficit

**Authors:** Lianne Merchuk-Ovnat\*, Roi Silberman\*, Efrat Laiba, Andreas Maurer, Klaus Pillen, Adi Faigenboim, Eyal Fridman

Table S3 Pairwise correlations between traits under WL and WW

| WW/WL | Variable | by Variable | Correlation | Count | Lower 95% | Upper 95% | Signif Prob |
|-------|----------|-------------|-------------|-------|-----------|-----------|-------------|
| WL    | GN       | GFP         | 0.2435      | 1242  | 0.1905    | 0.2952    | <.0001      |
| WL    | GW       | GFP         | 0.0412      | 1241  | -0.0145   | 0.0966    | 0.1469      |
| WL    | GW       | GN          | 0.0461      | 1243  | -0.0095   | 0.1015    | 0.104       |
| WL    | PGY      | GFP         | 0.2548      | 1281  | 0.2029    | 0.3053    | <.0001      |
| WL    | PGY      | GN          | 0.814       | 1240  | 0.7943    | 0.8319    | <.0001      |
| WL    | PGY      | GW          | 0.4321      | 1239  | 0.3856    | 0.4763    | <.0001      |
| WL    | HEA      | GFP         | -0.6681     | 1292  | -0.6972   | -0.6368   | <.0001      |
| WL    | HEA      | GN          | -0.2287     | 1244  | -0.2807   | -0.1754   | <.0001      |
| WL    | HEA      | GW          | -0.0694     | 1243  | -0.1245   | -0.0138   | 0.0144      |
| WL    | HEA      | PGY         | -0.2349     | 1283  | -0.2859   | -0.1825   | <.0001      |
| WL    | HEI      | GFP         | 0.1117      | 1232  | 0.0562    | 0.1665    | <.0001      |
| WL    | HEI      | GN          | 0.0613      | 1187  | 0.0044    | 0.1178    | 0.0347      |
| WL    | HEI      | GW          | 0.0452      | 1186  | -0.0118   | 0.1018    | 0.12        |
| WL    | HEI      | PGY         | 0.0748      | 1223  | 0.0188    | 0.1303    | 0.0089      |
| WL    | HEI      | HEA         | -0.1346     | 1234  | -0.1889   | -0.0794   | <.0001      |
| WL    | HI       | GFP         | 0.1575      | 1220  | 0.1022    | 0.2117    | <.0001      |
| WL    | HI       | GN          | 0.5542      | 1181  | 0.5134    | 0.5925    | <.0001      |
| WL    | HI       | GW          | 0.3901      | 1181  | 0.3406    | 0.4374    | <.0001      |
| WL    | HI       | PGY         | 0.7315      | 1220  | 0.7043    | 0.7565    | <.0001      |
| WL    | HI       | HEA         | -0.193      | 1220  | -0.2465   | -0.1384   | <.0001      |
| WL    | HI       | HEI         | -0.0033     | 1160  | -0.0608   | 0.0543    | 0.9107      |
| WL    | MAT      | GFP         | 0.1178      | 1292  | 0.0636    | 0.1712    | <.0001      |
| WL    | MAT      | GN          | -0.0346     | 1242  | -0.09     | 0.0211    | 0.2235      |
| WL    | MAT      | GW          | -0.0728     | 1241  | -0.1279   | -0.0172   | 0.0103      |
| WL    | MAT      | PGY         | -0.0344     | 1281  | -0.089    | 0.0204    | 0.2188      |
| WL    | MAT      | HEA         | 0.6225      | 1292  | 0.5879    | 0.6548    | <.0001      |
| WL    | MAT      | HEI         | -0.0639     | 1232  | -0.1194   | -0.0081   | 0.0248      |
| WL    | MAT      | HI          | -0.0778     | 1220  | -0.1334   | -0.0218   | 0.0065      |
| WL    | TDM      | GFP         | 0.1029      | 1265  | 0.0481    | 0.1572    | 0.0002      |
| WL    | TDM      | GN          | 0.3432      | 1218  | 0.2927    | 0.3919    | <.0001      |
| WL    | TDM      | GW          | 0.0833      | 1217  | 0.0272    | 0.1388    | 0.0036      |
| WL    | TDM      | PGY         | 0.3352      | 1255  | 0.2852    | 0.3835    | <.0001      |
| WL    | TDM      | HEA         | -0.0609     | 1265  | -0.1157   | -0.0058   | 0.0302      |
| WL    | TDM      | HEI         | 0.1832      | 1205  | 0.1281    | 0.2372    | <.0001      |
| WL    | TDM      | HI          | -0.0689     | 1220  | -0.1245   | -0.0128   | 0.0161      |
| WL    | TDM      | MAT         | 0.0179      | 1265  | -0.0372   | 0.073     | 0.5245      |
| WL    | VDW      | GFP         | 0.0016      | 1212  | -0.0548   | 0.0579    | 0.9569      |
| WL    | VDW      | GN          | 0.0189      | 1173  | -0.0384   | 0.0761    | 0.5179      |
| WL    | VDW      | GW          | -0.0814     | 1173  | -0.138    | -0.0242   | 0.0053      |
| WL    | VDW      | PGY         | -0.054      | 1212  | -0.11     | 0.0023    | 0.0601      |
| WL    | VDW      | HEA         | 0.0531      | 1212  | -0.0032   | 0.1091    | 0.0647      |
| WL    | VDW      | HEI         | 0.158       | 1152  | 0.1012    | 0.2138    | <.0001      |
| WL    | VDW      | HI          | -0.4759     | 1212  | -0.5183   | -0.4311   | <.0001      |
| WL    | VDW      | MAT         | 0.0603      | 1212  | 0.004     | 0.1162    | 0.0357      |
| WL    | VDW      | TDM         | 0.8927      | 1212  | 0.8807    | 0.9036    | <.0001      |

| <b>WW/WL</b> | <b>Variable</b> | <b>by Variable</b> | <b>Correlation</b> | <b>Count</b> | <b>Lower 95%</b> | <b>Upper 95%</b> | <b>Signif Prob</b> |
|--------------|-----------------|--------------------|--------------------|--------------|------------------|------------------|--------------------|
| WW           | GN              | GFP                | -0.1048            | 1295         | -0.1583          | -0.0506          | 0.0002             |
| WW           | GW              | GFP                | 0.1147             | 1295         | 0.0606           | 0.1682           | <.0001             |
| WW           | GW              | GN                 | -0.4408            | 1295         | -0.4837          | -0.3958          | <.0001             |
| WW           | PGY             | GFP                | -0.0402            | 1296         | -0.0944          | 0.0143           | 0.1483             |
| WW           | PGY             | GN                 | 0.8115             | 1295         | 0.792            | 0.8293           | <.0001             |
| WW           | PGY             | GW                 | -0.0132            | 1295         | -0.0676          | 0.0413           | 0.635              |
| WW           | HEA             | GFP                | -0.6285            | 1296         | -0.6604          | -0.5944          | <.0001             |
| WW           | HEA             | GN                 | 0.096              | 1295         | 0.0417           | 0.1497           | 0.0005             |
| WW           | HEA             | GW                 | -0.0236            | 1295         | -0.078           | 0.0309           | 0.3964             |
| WW           | HEA             | PGY                | 0.0855             | 1296         | 0.0312           | 0.1393           | 0.0021             |
| WW           | HEI             | GFP                | 0.1705             | 1296         | 0.1172           | 0.2229           | <.0001             |
| WW           | HEI             | GN                 | -0.0664            | 1295         | -0.1204          | -0.0119          | 0.0169             |
| WW           | HEI             | GW                 | 0.0929             | 1295         | 0.0386           | 0.1466           | 0.0008             |
| WW           | HEI             | PGY                | -0.0286            | 1296         | -0.0829          | 0.0259           | 0.3036             |
| WW           | HEI             | HEA                | -0.2141            | 1296         | -0.2655          | -0.1616          | <.0001             |
| WW           | HI              | GFP                | -0.0059            | 1254         | -0.0612          | 0.0495           | 0.8357             |
| WW           | HI              | GN                 | 0.4846             | 1253         | 0.4411           | 0.5259           | <.0001             |
| WW           | HI              | GW                 | 0.0729             | 1253         | 0.0176           | 0.1277           | 0.0099             |
| WW           | HI              | PGY                | 0.6407             | 1254         | 0.6069           | 0.6722           | <.0001             |
| WW           | HI              | HEA                | -0.035             | 1254         | -0.0902          | 0.0204           | 0.2152             |
| WW           | HI              | HEI                | -0.2163            | 1254         | -0.2685          | -0.1629          | <.0001             |
| WW           | MAT             | GFP                | 0.0259             | 1296         | -0.0286          | 0.0802           | 0.3521             |
| WW           | MAT             | GN                 | 0.0451             | 1295         | -0.0094          | 0.0993           | 0.1049             |
| WW           | MAT             | GW                 | 0.058              | 1295         | 0.0035           | 0.1121           | 0.0369             |
| WW           | MAT             | PGY                | 0.0846             | 1296         | 0.0303           | 0.1384           | 0.0023             |
| WW           | MAT             | HEA                | 0.7502             | 1296         | 0.7254           | 0.7731           | <.0001             |
| WW           | MAT             | HEI                | -0.1361            | 1296         | -0.1892          | -0.0823          | <.0001             |
| WW           | MAT             | HI                 | -0.0456            | 1254         | -0.1008          | 0.0097           | 0.1061             |
| WW           | TDM             | GFP                | -0.0385            | 1274         | -0.0932          | 0.0165           | 0.1699             |
| WW           | TDM             | GN                 | 0.3762             | 1273         | 0.328            | 0.4224           | <.0001             |
| WW           | TDM             | GW                 | -0.093             | 1273         | -0.1472          | -0.0382          | 0.0009             |
| WW           | TDM             | PGY                | 0.4036             | 1274         | 0.3566           | 0.4486           | <.0001             |
| WW           | TDM             | HEA                | 0.1491             | 1274         | 0.095            | 0.2024           | <.0001             |
| WW           | TDM             | HEI                | 0.2318             | 1274         | 0.1791           | 0.2831           | <.0001             |
| WW           | TDM             | HI                 | -0.4054            | 1254         | -0.4506          | -0.3581          | <.0001             |
| WW           | TDM             | MAT                | 0.1552             | 1274         | 0.1012           | 0.2084           | <.0001             |
| WW           | VDW             | GFP                | -0.0353            | 1242         | -0.0907          | 0.0204           | 0.2141             |
| WW           | VDW             | GN                 | 0.0846             | 1241         | 0.0291           | 0.1396           | 0.0029             |
| WW           | VDW             | GW                 | -0.1109            | 1241         | -0.1656          | -0.0556          | <.0001             |
| WW           | VDW             | PGY                | 0.0489             | 1242         | -0.0067          | 0.1042           | 0.085              |
| WW           | VDW             | HEA                | 0.1313             | 1242         | 0.0762           | 0.1855           | <.0001             |
| WW           | VDW             | HEI                | 0.2557             | 1242         | 0.203            | 0.307            | <.0001             |
| WW           | VDW             | HI                 | -0.7027            | 1242         | -0.7298          | -0.6733          | <.0001             |
| WW           | VDW             | MAT                | 0.1363             | 1242         | 0.0813           | 0.1905           | <.0001             |
| WW           | VDW             | TDM                | 0.9258             | 1242         | 0.9174           | 0.9334           | <.0001             |

**Supplementary data****Manuscript Title:** Genome scan identifies flowering-independent effects of barley HsDry2.2 locus on yield traits under water deficit**Authors:** Lianne Merchuk-Ovnat\*, Roi Silberman\*, Efrat Laiba, Andreas Maurer, Klaus Pillen, Adi Faigenboim, Eyal Fridman

Table S4 GWAS results for trait per se. The effect correspond to the percent difference between mean phenotypic value of homozygous for the wild allele compared to carriers of the cultivated Barke allele within the whole HEB-25 population

| <b>Marker</b>          | <b>Env</b> | <b>Trait</b> | <b>chr</b> | <b>CM</b> | <b>lod</b> | <b>effect</b> |
|------------------------|------------|--------------|------------|-----------|------------|---------------|
| SCRI_RS_197263         | WL         | MAT          | 1H         | 88.9      | 5.74E+00   | 1.7           |
| BOPA1_4962_1295        | WL         | VDW          | 1H         | 100       | 5.45E+00   | -8.7          |
| SCRI_RS_216088         | WL         | GFP          | 1H         | 122.2     | 7.62E+00   | 7.8           |
| SCRI_RS_153896         | WL         | HEA          | 1H         | 132.4     | 9.75E+00   | -3.6          |
| BOPA2_12_30871         | WL         | MAT          | 2H         | 20        | 1.66E+01   | 2.7           |
| BK_14                  | WL         | GN           | 2H         | 20        | 7.87E+00   | -19.7         |
| BK_15                  | WL         | GFP          | 2H         | 20        | 1.55E+01   | -10.12        |
| BK_15                  | WL         | HEA          | 2H         | 20        | 3.69E+01   | 6.77          |
| SCRI_RS_155067         | WL         | TDM          | 2H         | 57.4      | 6.19E+00   | -6.8          |
| SCRI_RS_196026         | WL         | GFP          | 2H         | 57.4      | 4.09E+01   | 17.6          |
| SCRI_RS_196026         | WL         | VDW          | 2H         | 57.4      | 1.00E+01   | -10           |
| SCRI_RS_235063         | WL         | HEA          | 2H         | 57.4      | 5.78E+01   | -7.7          |
| SCRI_RS_12492          | WL         | HI           | 2H         | 57.4      | 5.29E+00   | 26.58         |
| BOPA1_ABC08774_1_1_752 | WL         | MAT          | 2H         | 57.4      | 1.44E+01   | -2.12         |
| SCRI_RS_199987         | WL         | TDM          | 3H         | 40.7      | 2.57E+01   | 17.4          |
| SCRI_RS_199987         | WL         | VDW          | 3H         | 40.7      | 2.45E+01   | 20            |
| SCRI_RS_151711         | WL         | MAT          | 3H         | 103.8     | 6.17E+00   | -2.1          |
| SCRI_RS_120973         | WL         | GFP          | 3H         | 108       | 9.88E+00   | 9.06          |
| SCRI_RS_120973         | WL         | HEA          | 3H         | 108       | 1.83E+01   | -4.5          |
| SCRI_RS_103215         | WL         | HEI          | 3H         | 109.2     | 9.89E+01   | 21            |
| SCRI_RS_103215         | WL         | TDM          | 3H         | 109.2     | 6.60E+00   | 6.9           |
| SCRI_RS_103215         | WL         | VDW          | 3H         | 109.2     | 8.36E+00   | 9.8           |
| SCRI_RS_194316         | WL         | GFP          | 4H         | 51.4      | 7.72E+00   | 19            |
| SCRI_RS_13766          | WL         | MAT          | 5H         | 106       | 2.00E+01   | 2.9           |
| SCRI_RS_239128         | WL         | HEA          | 5H         | 115.3     | 2.97E+01   | 5.58          |
| SCRI_RS_189371         | WL         | GFP          | 5H         | 118       | 8.07E+00   | -6.7          |
| SCRI_RS_138461         | WL         | GFP          | 7H         | 29.8      | 6.88E+00   | -7.1          |
| BOPA2_12_30894         | WL         | HEA          | 7H         | 34.2      | 2.18E+01   | 5.7           |
| BOPA2_12_30894         | WL         | MAT          | 7H         | 34.2      | 1.46E+01   | 2.8           |
| BOPA1_5772_1176        | WW         | GN           | 1H         | 72.6      | 7.37E+00   | -12           |
| BOPA1_5772_1176        | WW         | PGY          | 1H         | 72.6      | 4.75E+00   | -8            |
| BOPA2_12_31319         | WW         | GW           | 1H         | 92.4      | 7.29E+00   | 8.6           |

|                        |    |     |    |       |          |        |
|------------------------|----|-----|----|-------|----------|--------|
| BOPA1_5336_400         | WW | VDW | 1H | 100   | 4.68E+00 | -7.5   |
| SCRI_RS_106754         | WW | TDM | 1H | 100   | 6.14E+00 | -6.5   |
| BOPA1_ABC05061_1_1_159 | WW | HEA | 1H | 128   | 8.58E+00 | -3.4   |
| SCRI_RS_153896         | WW | MAT | 1H | 132.4 | 8.16E+00 | -1.8   |
| BOPA1_3692_940         | WW | GW  | 2H | 2     | 7.67E+00 | 16.3   |
| BK_15                  | WW | GFP | 2H | 20    | 8.64E+00 | -5.16  |
| BK_15                  | WW | HEA | 2H | 20    | 3.87E+01 | 6.71   |
| BK_15                  | WW | MAT | 2H | 20    | 3.16E+01 | 3.6    |
| SCRI_RS_167882         | WW | TDM | 2H | 57.4  | 2.12E+01 | -11.6  |
| SCRI_RS_222769         | WW | HI  | 2H | 57.4  | 7.79E+00 | 6.14   |
| SCRI_RS_222769         | WW | MAT | 2H | 57.4  | 2.29E+01 | -2.6   |
| SCRI_RS_222769         | WW | VDW | 2H | 57.4  | 1.94E+01 | -12.9  |
| SCRI_RS_235063         | WW | GFP | 2H | 57.4  | 2.91E+01 | 11.5   |
| SCRI_RS_235063         | WW | HEA | 2H | 57.4  | 5.38E+01 | -7.3   |
| SCRI_RS_154973         | WW | PGY | 3H | 40.7  | 5.37E+00 | -9.2   |
| BOPA2_12_31475         | WW | HI  | 3H | 44.8  | 3.19E+01 | -18.9  |
| SCRI_RS_196189         | WW | TDM | 3H | 51.6  | 1.89E+01 | 11     |
| SCRI_RS_196189         | WW | VDW | 3H | 51.6  | 2.91E+01 | 19.4   |
| SCRI_RS_171144         | WW | TDM | 3H | 105   | 6.61E+00 | 10.54  |
| BOPA1_ABC13753_1_2_167 | WW | GN  | 3H | 105   | 7.14E+00 | -10.01 |
| BOPA1_6069_304         | WW | PGY | 3H | 108   | 1.13E+01 | -10.5  |
| SCRI_RS_138723         | WW | MAT | 3H | 108   | 1.17E+01 | -2     |
| SCRI_RS_120973         | WW | HEA | 3H | 108   | 2.10E+01 | -4.8   |
| SCRI_RS_103215         | WW | GFP | 3H | 109.2 | 1.09E+01 | 7.2    |
| SCRI_RS_103215         | WW | HEI | 3H | 109.2 | 1.26E+02 | 21     |
| SCRI_RS_103215         | WW | HI  | 3H | 109.2 | 2.63E+01 | -15.2  |
| SCRI_RS_103215         | WW | VDW | 3H | 109.2 | 1.22E+01 | 12.3   |
| BOPA1_3127_273         | WW | HI  | 4H | 54.8  | 4.93E+00 | 6.18   |
| BOPA2_12_31385         | WW | GN  | 4H | 60    | 6.02E+00 | 11.9   |
| BOPA1_41_695           | WW | TDM | 4H | 100.6 | 5.67E+00 | 6.66   |
| BOPA1_4771_380         | WW | GW  | 5H | 95    | 7.20E+00 | -3.5   |
| SCRI_RS_236583         | WW | HEA | 5H | 115.3 | 3.01E+01 | 5.3    |
| SCRI_RS_232705         | WW | GFP | 5H | 118   | 1.05E+01 | -5.9   |
| BOPA1_272_944          | WW | MAT | 5H | 118   | 2.03E+01 | 2.73   |
| BOPA2_12_30894         | WW | HEA | 7H | 34.2  | 2.92E+01 | 6.2    |
| BOPA2_12_30894         | WW | MAT | 7H | 34.2  | 1.83E+01 | 3      |
| BOPA2_12_30083         | WW | GFP | 7H | 45    | 9.89E+00 | -7.2   |

**Supplementary data****Manuscript Title:** Genome scan identifies flowering-independent effects of barley HsDry2.2 locus on yield traits under water deficit**Authors:** Lianne Merchuk-Ovnat\*, Roi Silberman\*, Efrat Laiba, Andreas Maurer, Klaus Pillen, Adi Faigenboim, Eyal Fridman

Table S5 QxE loci for the different traits over two years trials. The effect is calculated as the difference between the effect of the wild allele under WW and WL. Positive values indicate higher increasing or less reducing effect of the wild allele under WL. DR, Detection rate calculated across 200 repeated subsamples of 70% from HRB-25 population (see Methods)

| Marker         | Trait | chr | cM    | DR[%] | effect |
|----------------|-------|-----|-------|-------|--------|
| BOPA2_12_30304 | PGY   | 1H  | 57.3  | 64    | 8.01   |
| SCRI_RS_216088 | PGY   | 1H  | 122.2 | 80    | 10.95  |
| SCRI_RS_216088 | GN    | 1H  | 122.2 | 91    | 15.37  |
| SCRI_RS_188893 | GFP   | 2H  | 20    | 63.5  | -6.06  |
| SCRI_RS_157207 | VDW   | 2H  | 57.4  | 58.5  | 5.45   |
| SCRI_RS_100054 | PGY   | 2H  | 57.4  | 100   | 13.65  |
| SCRI_RS_208320 | GN    | 2H  | 57.4  | 95    | 19.08  |
| SCRI_RS_196026 | GFP   | 2H  | 57.4  | 78.5  | 6.2    |
| SCRI_RS_185710 | TDM   | 2H  | 57.4  | 100   | 4.69   |
| SCRI_RS_146425 | PGY   | 3H  | 44.8  | 100   | 13.24  |
| SCRI_RS_230096 | GN    | 3H  | 44.8  | 97    | 11.59  |
| SCRI_RS_223894 | VDW   | 3H  | 51.6  | 96.5  | -8     |
| SCRI_RS_173348 | PGY   | 3H  | 51.6  | 86    | 7.7    |
| SCRI_RS_173348 | GN    | 3H  | 51.6  | 61.5  | 8.6    |
| SCRI_RS_206510 | PGY   | 3H  | 103.8 | 100   | 4.75   |
| SCRI_RS_206510 | GN    | 3H  | 103.8 | 54.5  | 6.76   |
| SCRI_RS_138221 | GN    | 5H  | 98.1  | 82.5  | -13.47 |
| SCRI_RS_231239 | TDM   | 5H  | 109.7 | 73    | -4.49  |
| SCRI_RS_207174 | GFP   | 6H  | 54.9  | 33.5  | 2.96   |
| SCRI_RS_204148 | PGY   | 6H  | 61    | 89.5  | 2.58   |
| SCRI_RS_219709 | TDM   | 7H  | 24.5  | 67    | -4.65  |
| SCRI_RS_187827 | TDM   | 7H  | 43.8  | 68.5  | -3.7   |



**Supplementary data****Manuscript Title:** Genome scan identifies flowering-independent effects of barley HsDry2.2 locus on yield traits under water deficit**Authors:** Lianne Merchuk-Ovnat\*, Roi Silberman\*, Efrat Laiba, Andreas Maurer, Klaus Pillen, Adi Faigenboim, Eyal Fridman

Table S6 Pot experiment ANOVA

Analysis of variance (ANOVA) for the measured traits: total DM (TDM, gr/plant), plant grain yield (PGY, gr/plant), harvest index (HI), spike per plant, grain number of three first spike (GN- first three), grain number (GN all), grain weight of three first spike (GW- first three), grain weight (GW, all), days from planting to booting (HEA, days), ripening period (RIP, days), Flag leaf sheath (cm) length, stem diameter (cm), -1 flag leaf blade width (cm), -1 flag leaf blade length.

| Source                        | Irrigation Treatment<br>(d.f.=2)<br>F ratio | Genotype<br>(d.f.=1)<br>F ratio | Irrigation x Genotype<br>(d.f.=2)<br>F ratio | d.f. error |
|-------------------------------|---------------------------------------------|---------------------------------|----------------------------------------------|------------|
| <b>TDM</b>                    | 57.05<br>***                                | 0.08                            | 0.21                                         | 49         |
| <b>PGY</b>                    | 14.94<br>***                                | 8.83<br>**                      | 2.82<br>^                                    | 45         |
| <b>HI</b>                     | 10.58<br>**                                 | 7.76<br>**                      | 0.53                                         | 44         |
| <b>Spike number</b>           | 4.27<br>*                                   | 2.1                             | 0.4                                          | 48         |
| <b>GN- three first spike</b>  | 1.01                                        | 4.72<br>*                       | 2.8<br>^                                     | 38         |
| <b>GN- all</b>                | 1.78                                        | 3.09<br>^                       | 2.54<br>^                                    | 40         |
| <b>TGW- three first spike</b> | 3.09<br>^                                   | 3.67<br>^                       | 1.06                                         | 38         |
| <b>TGW- all</b>               | 10.62<br>***                                | 3.48<br>^                       | 1.36                                         | 38         |
| <b>HEA</b>                    | 7.27<br>***                                 | 6.43<br>*                       | 0.45                                         | 49         |
| <b>GFP</b>                    | 4.03<br>*                                   | 4.43<br>*                       | 0.21                                         | 42         |
| <b>FL sheath length</b>       | 2.11                                        | 4.98<br>*                       | 1.36                                         | 42         |
| <b>Stem diameter</b>          | 1.07                                        | 8.77<br>***                     | 0.05                                         | 48         |
| <b>minus 1 FL width</b>       | 5.21<br>**                                  | 9.83<br>**                      | 2.11                                         | 42         |
| <b>minus 1 FL length</b>      | 5.34<br>***                                 | 26.22<br>***                    | 0.79                                         | 42         |
| <b>Senescence</b>             | 10.73<br>***                                | 4.17<br>*                       | 0.33                                         | 47         |

\*, \*\*, \*\*\* represent  $P < 0.05$ ,  $0.01$  and  $0.001$ , respectively.

^ represent  $P < 0.1$

**Supplementary data**

**Manuscript Title:** Genome scan identifies flowering-independent effects of barley HsDry2.2 locus on yield traits under water deficit **Authors:** Lianne Merchuk-Ovnat\*, Roi Silberman\*, Efrat Laiba, Andreas Maurer, Klaus Pillen, Adi Faigenboim, Eyal Fridman

File S1

R-script for the GWAF analysis

```
library(GWAF)
```

```
library(kinship2)
```

```
ped=read.csv(file="ped_file.csv", header=TRUE,sep=",")
```

```
kmat<-makekinship(ped$famid,ped$id,ped$fa,ped$mo)
```

```
kmat<-kmat*2
```

```
save(kmat,file="heb_interaction_kinship.Rdata")
```

```
lme.pack.int.batch(phenfile="trait.csv",genfile="geno_file.csv",  
pedfile="ped_file.csv",kinmat="heb_interaction_kinship.Rdata",phen="trait",  
outfile="trait.lme.quant.int.csv",covars=c('dry'), cov.int='dry', sub='N',  
sep.ped=',', sep.phe=',', sep.gen=',',col.names=F)
```
